# Supplementary material
Source: MDPI journal article supplement (https://www.mdpi.com/2079-6412/12/1/84)
Supplement: s1 [file s1 › coatings-1531660-supplementary.pdf]

# Supplementary Materials: Reduction of Surface Residual Lithium Compounds for Single-Crystal $\text{LiNi}_{0.6}\text{Mn}_{0.2}\text{Co}_{0.2}\text{O}_2$ via $\text{Al}_2\text{O}_3$ Atomic Layer Deposition and Post-Annealing

Jiawei Li <sup>1</sup>, Junren Xiang <sup>1</sup>, Ge Yi <sup>1</sup>, Yuanting Tang <sup>2</sup>, Huachen Shao <sup>1</sup>, Xiao Liu <sup>1,\*</sup>, Bin Shan <sup>2</sup> and Rong Chen <sup>1,\*</sup>

- <sup>1</sup> State Key Laboratory of Digital Manufacturing Equipment and Technology, School of Mechanical Science and Engineering, Huazhong University of Science and Technology, Wuhan 430074, China; jiaweili@hust.edu.cn (J.L.); junrenxiang@hust.edu.cn (J.X.); geyigeyi@hust.edu.cn (G.Y.); shaohuachen@hust.edu.cn (H.S.)
- <sup>2</sup> State Key Laboratory of Materials Processing and Die and Mould Technology, School of Materials Science and Engineering, Huazhong University of Science and Technology, Wuhan 430074, China; yuanting015@163.com (Y.T.); bshan@mail.hust.edu.cn (B.S.)
- \* Correspondence: xiaoliu@hust.edu.cn (X.L.); rongchen@mail.hust.edu.cn (R.C.)

**Citation:** Li, J.; Xiang, J.; Yi, G.; Tang, Y.; Shao, H.; Liu, X.; Shan, B.; Chen, R. Reduction of Surface Residual Lithium Compounds for Single-Crystal  $\text{LiNi}_{0.6}\text{Mn}_{0.2}\text{Co}_{0.2}\text{O}_2$  via  $\text{Al}_2\text{O}_3$  Atomic Layer Deposition and Post-Annealing. *Coatings* **2022**, *12*, 84. <https://doi.org/10.3390/coatings12010084>

Academic Editor: Alessio Lamperti

Received: 14 December 2021

Accepted: 6 January 2022

Published: 12 January 2022

**Publisher's Note:** MDPI stays neutral with regard to jurisdictional claims in published maps and institutional affiliations.

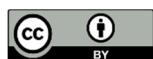

**Copyright:** © 2022 by the authors. Licensee MDPI, Basel, Switzerland. This article is an open access article distributed under the terms and conditions of the Creative Commons Attribution (CC BY) license (<https://creativecommons.org/licenses/by/4.0/>).

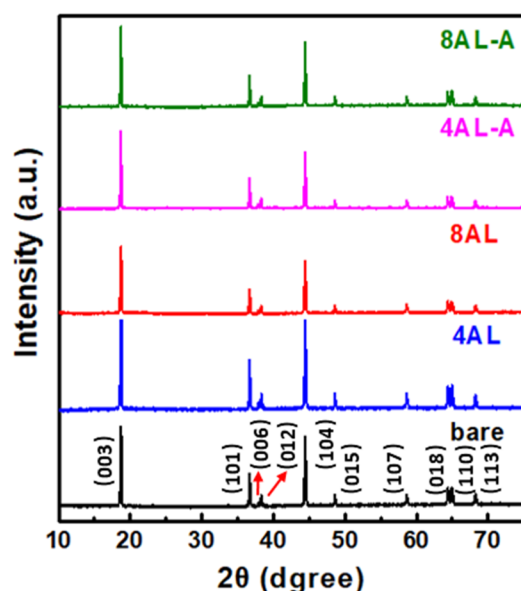

**Figure S1.** XRD patterns of bare, 4AL, 8AL, 4AL-A and 8AL-A NCM622 particles (the red arrows indicate diffraction peaks at  $2\theta$  of  $37.9^\circ$  and  $38.3^\circ$ ). All samples show well-separated (006)/(012) peaks and (108)/(110) peaks, implying the typical  $\alpha\text{-NaFeO}_2$  layered structure. No extra peaks and no peak shift are detected in the XRD patterns of 4AL, 8AL, 4AL-A and 8AL-A samples, indicating that the ALD and post-annealing processes have no influence on the crystal structure of substrate materials.

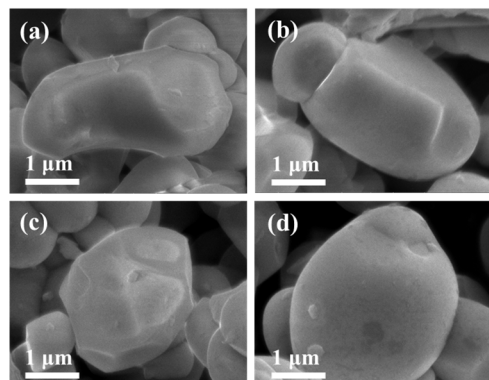

**Figure S2.** SEM images of (a) 4AL, (b) 8AL, (c) 4AL-A and (d) 8AL-A NCM622 particles. No obvious changes are observed in the morphologies after the ALD process or post-annealing.

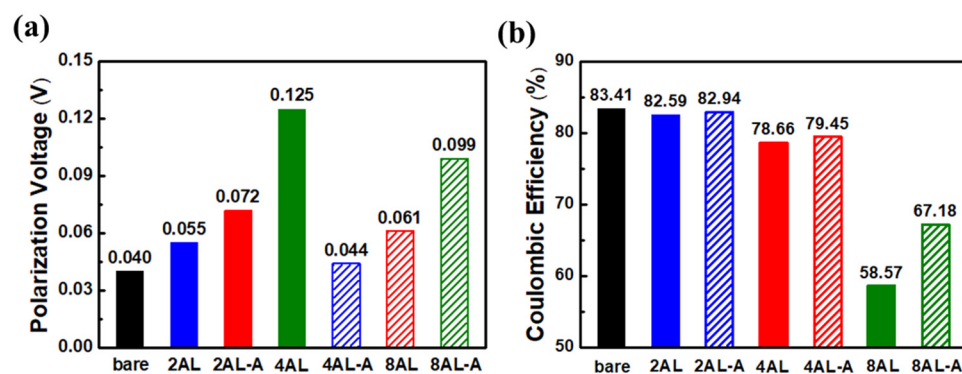

**Figure S3.** (a) Polarization voltages at the initial discharge stage and (b) initial coulombic efficiencies of bare, coated and annealed NCM622 cathodes. The post-annealing relieves the increment of polarization voltages and the decline of coulombic efficiencies.

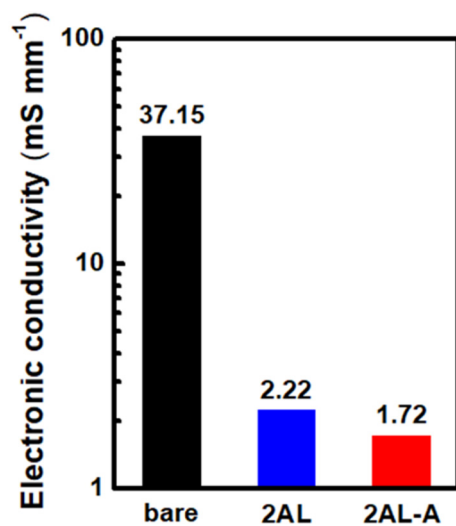

**Figure S4.** Electronic conductivities of bare, 2AL, and 2AL-A NCM622 particles. The electronic conductivity decreases after the  $\text{Al}_2\text{O}_3$  ALD process and post-annealing process.

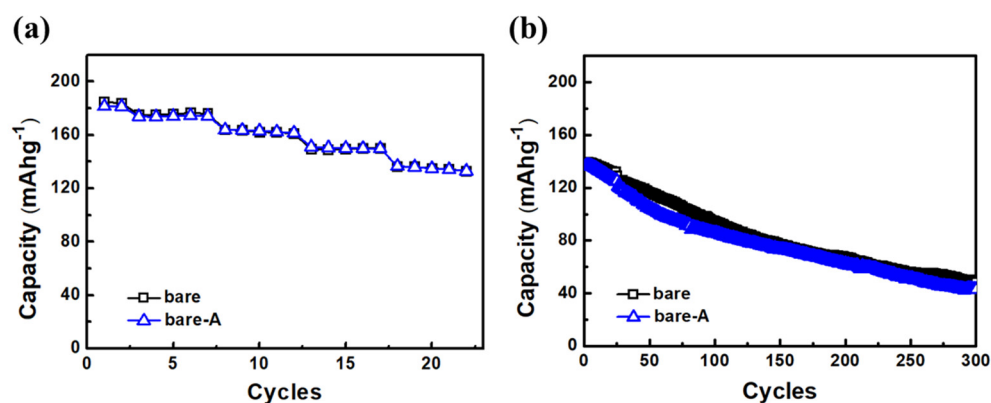

**Figure S5.** (a) Rate capability and (b) cycling stability of bare and bare-A NCM622 cathodes. These two cathodes show similar rate capability and cycling stability.

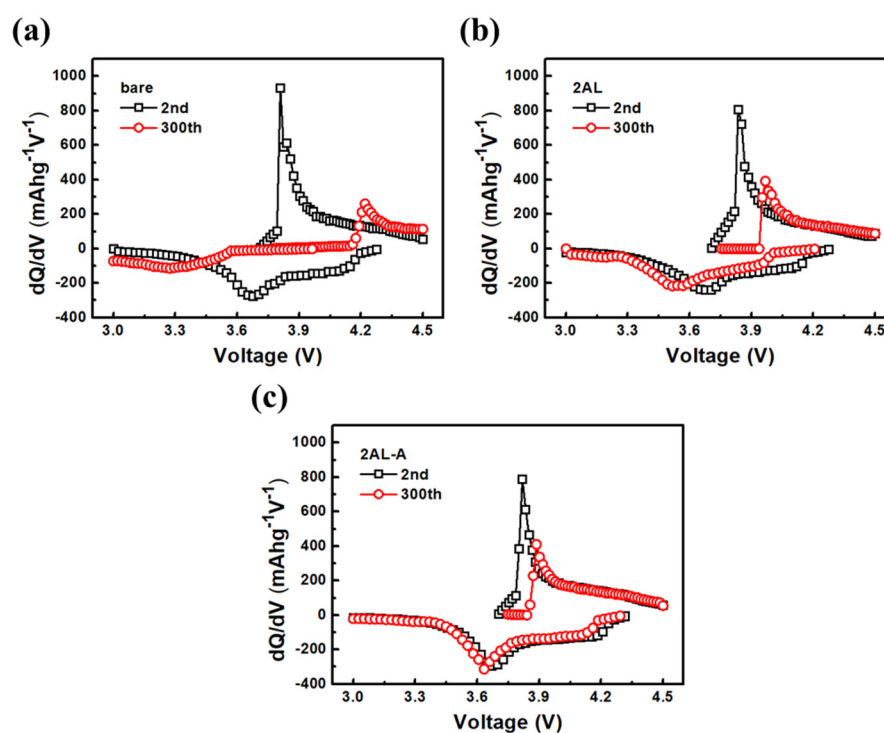

**Figure S6.** Differential capacity versus voltage profiles of (a) bare, (b) 2AL, and (c) 2AL-A NCM622 cathodes at the 2nd and 300th charge-discharge cycles. The 2AL-A NCM622 cathode well keeps the potential difference and intensity of redox peaks after cycles compared to others.

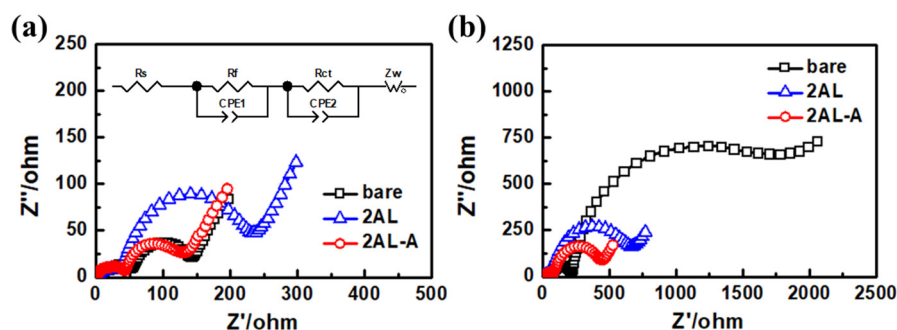

**Figure S7.** Electrochemical impedance spectra (EIS) of bare, 2AL, and 2AL-A NCM622 cathodes after the 2nd charge-discharge cycle (a) and the 300th charge-discharge cycle (b) at a charged state of 4.5V. The 2AL-A NCM622 cathode shows the lowest increment of  $R_{ct}$  compared to others.

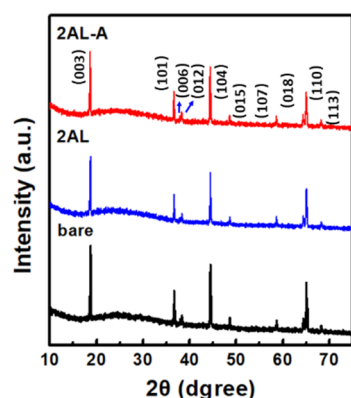

**Figure S8.** XRD patterns of bare, 2AL, and 2AL-A NCM622 cathodes before cycling (the blue arrows indicate diffraction peaks at  $2\theta$  of  $37.9^\circ$  and  $38.3^\circ$ ). No obvious difference of crystal structures is observed among bare, 2AL, and 2AL-A NCM622 cathodes before cycling.

**Table S1.** Cycling stability of NCM622 cathodes at 1 C in this study compared to literature reports.

| Years     | Modification Strategy                                          | Test Conditions  | Capacity Retention | Capacity Loss Per Cycle |
|-----------|----------------------------------------------------------------|------------------|--------------------|-------------------------|
| This work | Al <sub>2</sub> O <sub>3</sub> ALD and post-annealing          | 3.0–4.5 V, 1 C   | 92.2 %, 300 cycles | 0.026%                  |
| 2021[1]   | F doping                                                       | 3.0–4.3 V, 1 C   | 94.5 %, 100 cycles | 0.055%                  |
| 2021[2]   | Al and Zr doping                                               | 2.8–4.3 V, 1 C   | 92.1 %, 100 cycles | 0.079%                  |
| 2020[3]   | ZrO <sub>2</sub> coating and post-annealing                    | 2.8–4.5 V, 1 C   | 98.5 %, 150 cycles | 0.01%                   |
| 2021[4]   | ZrW <sub>2</sub> O <sub>8</sub> coating                        | 2.8–4.5 V, 1 C   | 82.0 %, 100 cycles | 0.18%                   |
| 2019[5]   | B doping                                                       | 2.8–4.5 V, 1 C   | 96.1 %, 50 cycles  | 0.078%                  |
| 2021[6]   | Li-Si-O coating                                                | 3.0–4.5 V, 1 C   | 90.6 %, 100 cycles | 0.094%                  |
| 2021[7]   | H <sub>3</sub> BO <sub>3</sub> treatment                       | 3.0–4.5 V, 1 C   | 88.5 %, 200 cycles | 0.058%                  |
| 2018[8]   | Al <sub>2</sub> O <sub>3</sub> and LiAlO <sub>2</sub> coatings | 2.7–4.5 V, 0.2 C | 84.5 %, 100 cycles | 0.155%                  |

## References

- Huang, X.; Zhang, P.; Liu, Z.; Ma, B.; Zhou, Y.; Tian, X. Fluorine Doping Induced Crystal Space Change and Performance Improvement of Single Crystalline LiNi<sub>0.6</sub>Co<sub>0.2</sub>Mn<sub>0.2</sub>O<sub>2</sub> Layered Cathode Materials. *ChemElectroChem* **2021**, *8*, 1–7, doi:10.1002/celec.202100756.
- Feng, Z.; Zhang, S.; Rajagopalan, R.; Huang, X.; Ren, Y.; Sun, D.; Wang, H.; Tang, Y. Dual-Element-Modified Single-Crystal LiNi<sub>0.6</sub>Co<sub>0.2</sub>Mn<sub>0.2</sub>O<sub>2</sub> as a Highly Stable Cathode for Lithium-Ion Batteries. *ACS Appl Mater Interfaces* **2021**, *13*, 43039–43050, doi:10.1021/acsami.1c10799.
- Bao, W.; Qian, G.; Zhao, L.; Yu, Y.; Su, L.; Cai, X.; Zhao, H.; Zuo, Y.; Zhang, Y.; Li, H.; et al. Simultaneous Enhancement of Interfacial Stability and Kinetics of Single-Crystal LiNi<sub>0.6</sub>Mn<sub>0.2</sub>Co<sub>0.2</sub>O<sub>2</sub> through Optimized Surface Coating and Doping. *Nano Lett* **2020**, *20*, 8832–8840, doi:10.1021/acs.nanolett.0c03778.
- Xu, S.; Jing, N.; Hao, H.; Wang, M.; Wang, Z.; Yang, L.; Wang, G.; Chen, J.; Wang, G. Enhanced Electrochemical Performance of LiNi<sub>0.6</sub>Co<sub>0.2</sub>Mn<sub>0.2</sub>O<sub>2</sub> by a Negative-Thermal-Expansion Material at Elevated Temperature. *Energy Technology* **2021**, *9*, doi:10.1002/ente.202100183.
- Huang, B.; Yang, X.; Xu, G.; Wang, M.; Gu, Y. Boron-doped single crystal LiNi<sub>0.6</sub>Mn<sub>0.2</sub>Co<sub>0.2</sub>O<sub>2</sub> with improved electrochemical performance for lithium-ion batteries. *Ionics* **2019**, *25*, 5819–5827, doi:10.1007/s11581-019-03166-3.
- Li, G.; You, L.; Wen, Y.; Zhang, C.; Huang, B.; Chu, B.; Wu, J.H.; Huang, T.; Yu, A. Ultrathin Li-Si-O Coating Layer to Stabilize the Surface Structure and Prolong the Cycling Life of Single-Crystal LiNi<sub>0.6</sub>Co<sub>0.2</sub>Mn<sub>0.2</sub>O<sub>2</sub> Cathode Materials at 4.5 V. *ACS Appl Mater Interfaces* **2021**, *13*, 10952–10963, doi:10.1021/acsami.0c22356.
- Wang, W.; Wu, L.; Li, Z.; Huang, K.; Chen, Z.; Lv, C.; Dou, H.; Zhang, X. Stabilization of a 4.7 V High-Voltage Nickel-Rich Layered Oxide Cathode for Lithium-Ion Batteries through Boron-Based Surface Residual Lithium-Tuned Interface Modification Engineering. *ChemElectrochem* **2021**, *8*, 2014–2021, doi:10.1002/celec.202100125.
- Liu, W.; Li, X.; Xiong, D.; Hao, Y.; Li, J.; Kou, H.; Yan, B.; Li, D.; Lu, S.; Koo, A.; et al. Significantly improving cycling performance of cathodes in lithium ion batteries: The effect of Al<sub>2</sub>O<sub>3</sub> and LiAlO<sub>2</sub> coatings on LiNi<sub>0.6</sub>Co<sub>0.2</sub>Mn<sub>0.2</sub>O<sub>2</sub>. *Nano Energy* **2018**, *44*, 111–120, doi:10.1016/j.nanoen.2017.11.010.
